# Supplementary material for: Surface velocity of the Northeast Greenland Ice Stream (NEGIS): assessment of interior velocities derived from satellite data by GPS
Source: Copernicus journal article supplement (doi:10.5194/tc-14-3487-2020), 2020-10-22
Supplement: Supplementary file 1 [file tc-14-3487-2020-supplement.zip]

Archive with 4 entries (4 files):
- Hvidbergetal-SupplementaryFigures.pdf
- tc-14-3487-2020-supplement-title-page.pdf
- SupplementaryTableS2.xlsx
- SupplementaryTableS1.xlsx
