# Supplementary material for: Surface velocity of the Northeast Greenland Ice Stream (NEGIS): assessment of interior velocities derived from satellite data by GPS
Source: Copernicus journal article supplement (doi:10.5194/tc-14-3487-2020), 2020-10-22
Supplement: Supplementary file 1 [file tc-14-3487-2020-supplement.zip › tc-14-3487-2020-supplement-title-page.pdf]

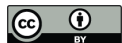

## *Supplement of*

# **Surface velocity of the Northeast Greenland Ice Stream (NEGIS): assessment of interior velocities derived from satellite data by GPS**

**Christine S. Hvidberg et al.**

*Correspondence to:* Christine S. Hvidberg (ch@nbi.ku.dk)

- tc-14-3487-2020-supplement-title-page.pdf
- Hvidbergetal-SupplementaryFigures.pdf
- SupplementaryTableS1.xlsx
- SupplementaryTableS2.xlsx

The copyright of individual parts of the supplement might differ from the CC BY 4.0 License.
